# Psychiatric Services

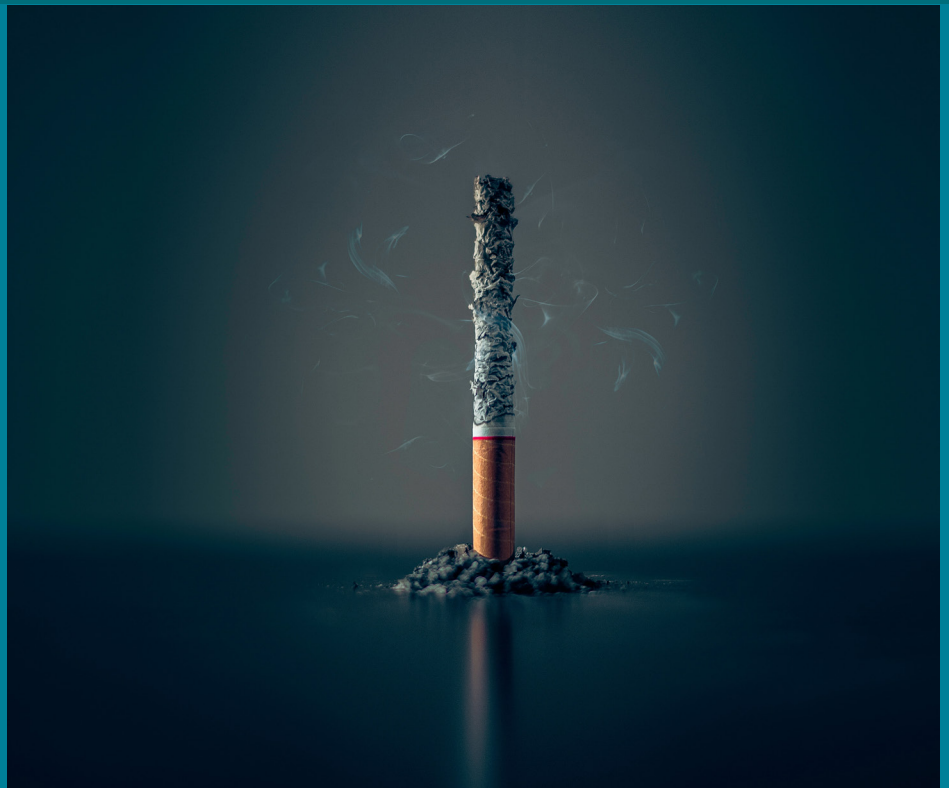

Barriers to using smoking cessation medication, 2005–2019

Mental health consumers' perspectives on psychiatric advance directives

Detecting cognitive distortions in text messages, potential for clinical support

Taking an evidence-based approach to involuntary hospitalization
